# Supplementary material for: Tip of the iceberg: a tertiary care centre retrospective study of left ventricular hypertrophy aetiologies
Source: PubMed Central journal article supplement — Open Heart. 2021 Jan 13;8(1):e001462. doi: 10.1136/openhrt-2020-001462 (PMC7812093; doi:10.1136/openhrt-2020-001462), 2021-01-13
Supplement: openhrt-2020-001462supp001.pdf [file openhrt-2020-001462supp001.pdf]

| Characteristic                       | Amyloidosis |               | Sarcomeric HCM |               | Hypertensive CMP |               | Undetermined |               | Other |               |
|--------------------------------------|-------------|---------------|----------------|---------------|------------------|---------------|--------------|---------------|-------|---------------|
| Age (y)                              | 79          | [70 – 84]     | 59             | [49 – 68]     | 64               | [51 – 74]     | 74           | [61 – 81]     | 58    | [45.7 – 71.3] |
| Female, N (%)                        | 41          | (20.2%)       | 76             | (40.0%)       | 40               | (31.2%)       | 11           | (24.4%)       | 10    | (40.0%)       |
| BMI (kg/m <sup>2</sup> )             | 25.1        | [22.8 – 27.7] | 26.1           | [22.8 – 30.1] | 27.4             | [24.4 – 29.8] | 28.7         | [23.6 – 32.0] | 23.7  | [20.3 – 28.1] |
| BSA (m <sup>2</sup> )                | 1.85        | [1.74 – 1.93] | 1.86           | [1.69 – 2.00] | 1.87             | [1.74 – 2.01] | 1.94         | [1.74 – 2.07] | 1.86  | [1.57 – 1.97] |
| Arterial hypertension, N (%)         | 103         | (50.7%)       | 96             | (5.5%)        | 128              | (100%)        | 31           | (68.9%)       | 14    | (56.0%)       |
| Neuromuscular disorder, N (%)        | 97          | (47.8%)       | 7              | (3.7%)        | 6                | (4.7%)        | 5            | (11.1%)       | 2     | (8.0%)        |
| NYHA class                           | 2           | [2 – 3]       | 2              | [1 – 2]       | 2                | [1 – 2]       | 2            | [1 – 3]       | 2     | [1 – 2]       |
| Electrical hypertrophy, N (%)        | 13          | (6.4%)        | 70             | (36.8%)       | 33               | (25.8%)       | 9            | (20.0%)       | 7     | (28.0%)       |
| Conduction disorder or PPM, N (%)    | 139         | (68.8%)       | 84             | (44.2%)       | 45               | (35.2%)       | 19           | (42.2%)       | 17    | (68.0%)       |
| Ventricular arrhythmia or ICD, N (%) | 7           | (3.5%)        | 29             | (15.3%)       | 2                | (1.6%)        | 2            | (4.4%)        | 7     | (28.0%)       |

**SUPPLEMENTAL MATERIAL**  
**S1. Patient characteristics according to LVH etiology**

| Characteristic                         | Amyloidosis |                | Sarcomeric HCM |                 | Hypertensive CMP |                 | Undetermined |                 | Other |                 |
|----------------------------------------|-------------|----------------|----------------|-----------------|------------------|-----------------|--------------|-----------------|-------|-----------------|
| Maximal LVWT (mm)                      | 15          | [14 – 18]      | 16             | [14 – 18]       | 14               | [13 – 16]       | 14           | [13 – 16]       | 13    | [12 – 15]       |
| Indexed LV mass (g/m <sup>2</sup> )    | 131         | [112 – 156]    | 115            | [92 – 146]      | 128              | [103 – 154]     | 116          | [97 – 157]      | 140   | [109 – 171]     |
| Indexed LA volume (ml/m <sup>2</sup> ) | 48          | [39 – 57]      | 46             | [34 – 59]       | 44               | [30 – 55]       | 47           | [35 – 67]       | 37    | [24 – 59]       |
| LVEF (%)                               | 50          | [41 – 58]      | 62             | [56 – 68]       | 59               | [48 – 65]       | 59           | [52 – 63]       | 55    | [38 – 63]       |
| LV GLS (%)                             | -11.0       | [-13.3 – -8.8] | -15.1          | [-18.3 – -11.8] | -14.8            | [-17.9 – -10.9] | -16.5        | [-18.1 – -12.7] | -14.5 | [-16.4 – -10.2] |
| TAPSE (mm)                             | 16          | [13 – 19]      | 21             | [18 – 24]       | 21               | [18 – 25]       | 20           | [16 – 22]       | 19    | [16 – 24]       |
| S'T (cm/s)                             | 10.0        | [8.0 – 12.0]   | 13.0           | [11.0 – 15.0]   | 12.0             | [10.0 – 14.0]   | 12.0         | [9.2 – 14.8]    | 13.0  | [8.0 – 14.6]    |

**S1. Transthoracic echocardiography findings according to LVH etiology**

*Abbreviations as in Table 1.*

Abbreviations as in Table 2.

### S3. Distribution of cardiac amyloidosis etiologies

| Subtypes of amyloidosis  | N   | (%)    |
|--------------------------|-----|--------|
| All ATTR                 | 154 | (75.9) |
| <i>Inherited ATTR</i>    | 26  | (12.8) |
| <i>Wild-type ATTR</i>    | 93  | (45.8) |
| <i>Undetermined ATTR</i> | 35  | (17.2) |
| AL                       | 45  | (22.2) |
| Other                    | 4   | (2.0)  |

AL: light-chain amyloidosis, ATTR: transthyretin amyloidosis, Undetermined ATTR corresponds to patients who were not able to consent to or declined genetic screening.

### S4. Sarcomere gene testing and distribution of mutations

| Genetics in sarcomeric HCM | N  | (%)    | (% of mutated) |
|----------------------------|----|--------|----------------|
| Untested                   | 56 | (29.6) | (NA)           |
| MYBPC3 mutation            | 20 | (10.5) | (50.0)         |
| MYH7 mutation              | 15 | (7.9)  | (37.5)         |
| TNNI3 mutation             | 1  | (0.5)  | (2.5)          |
| MYL2 mutation              | 2  | (1.1)  | (5.0)          |
| TNNT2 mutation             | 2  | (1.1)  | (5.0)          |
| No known mutation          | 71 | (37.4) | (NA)           |
| Pending or unknown results | 23 | (12.1) | (NA)           |

MYBPC3: myosin binding protein 3, MYH7: myosin heavy chain 3, MYL2: myosin regulatory light chain 2, TNNI3: troponin I 3, TNNT2: troponin T 2.
