# Supplementary figures and images for: Tip of the iceberg: a tertiary care centre retrospective study of left ventricular hypertrophy aetiologies
Source: PubMed Central journal article supplement — Open Heart. 2021 Jan 13;8(1):e001462. doi: 10.1136/openhrt-2020-001462 (PMC7812093; doi:10.1136/openhrt-2020-001462), 2021-01-13

**A**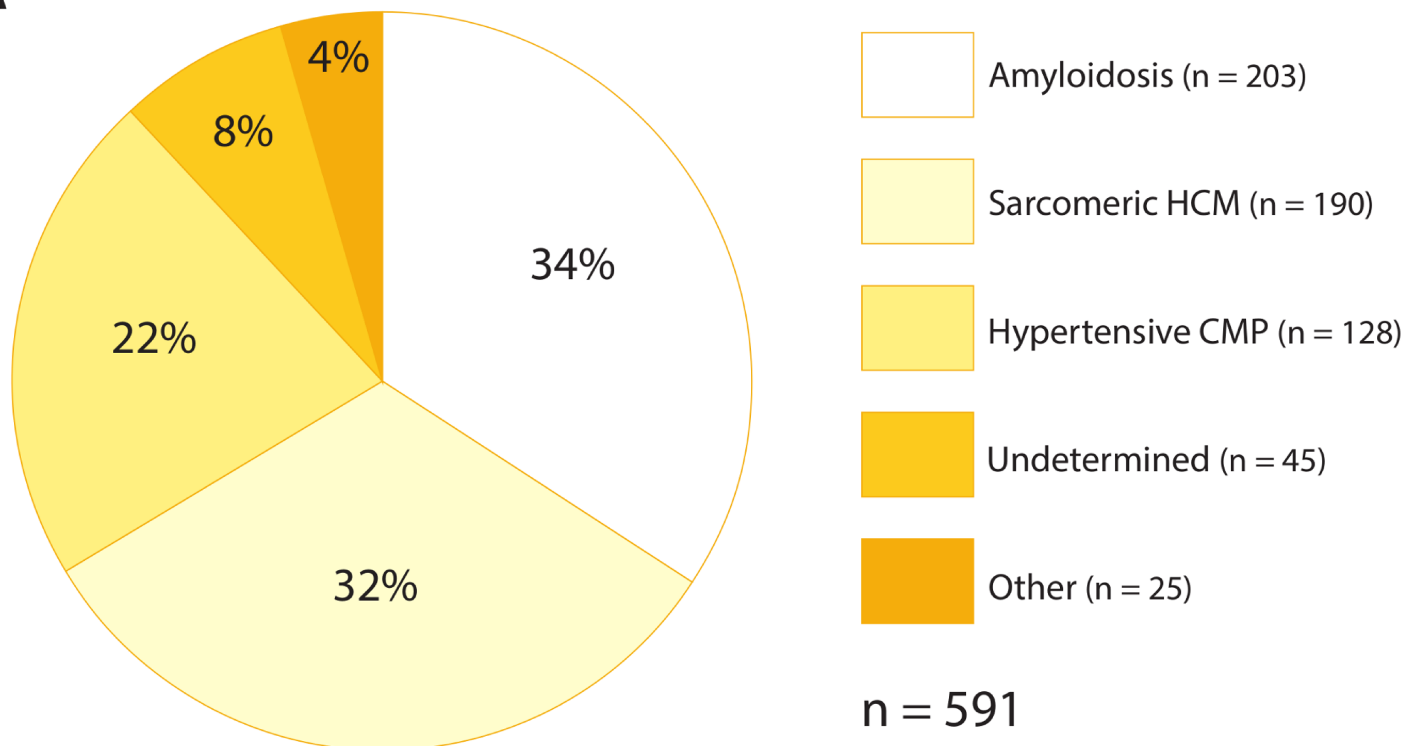**B**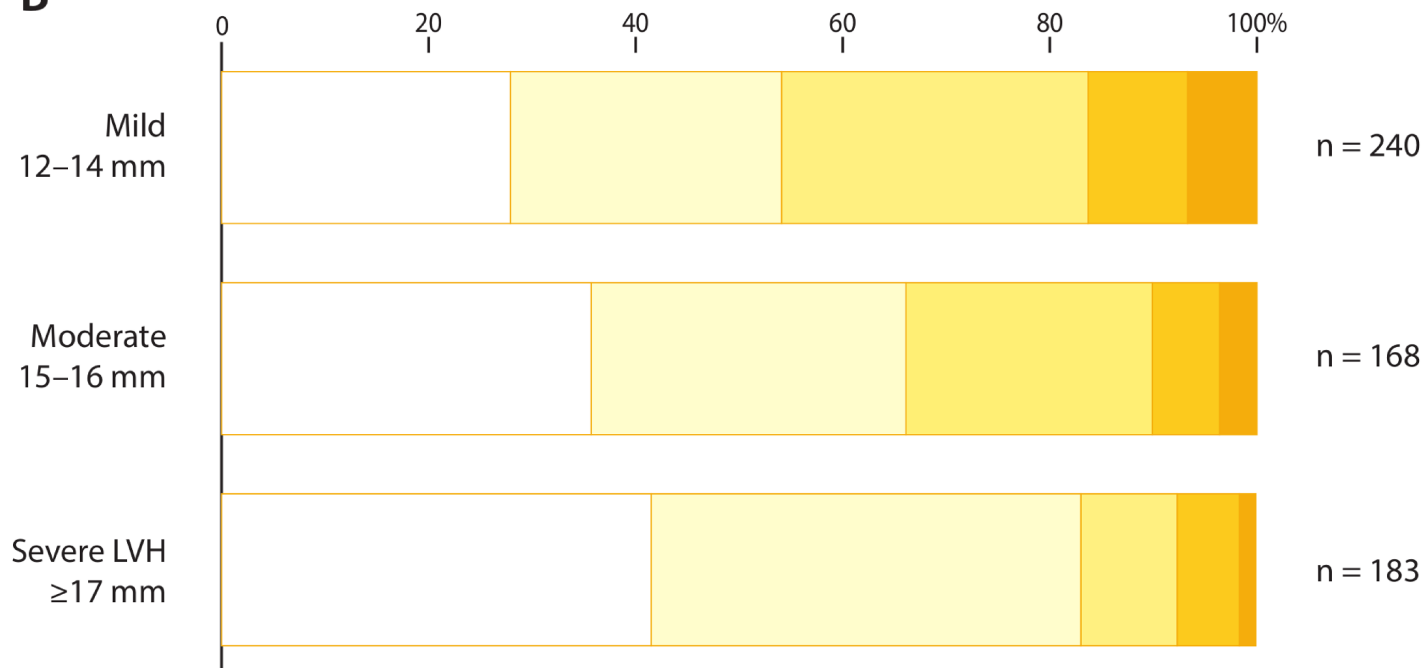

Supplement: openhrt-2020-001462supp002.pdf [file openhrt-2020-001462supp002.pdf]
